# Supplementary material
Source: PubMed Central journal article supplement (PMC3945381)
Supplement: supp_M113.533638_jbc.M113.533638-1.pdf [file supp_M113.533638_jbc.M113.533638-1.pdf]

## Online Supplementary Information

**TABLE S-I: PRIMERS FOR CLONING, GENOMIC PCR & QUANTITATIVE RT-PCR**

| Name                                  | Sequence                          | Comments                        |
|---------------------------------------|-----------------------------------|---------------------------------|
| EGFP-forward                          | ACACCCTGGTGAACCGCAT               | 50 nM; Ta=60°C                  |
| EGFP-reverse                          | CCATGATATAGACGTTGTGGCTGTT         | 50 nM; Ta=60°C                  |
| Microglobulin-forward                 | GCTATCCAGAAAACCCCTCAA             | 50 nM; Ta=60°C                  |
| Microglobulin-reverse                 | CATGTCTCGATCCCAGTAGACGGT          | 50 nM; Ta=60°C                  |
| PMCA4a forward                        | TCAACACCTTGATGTAAAACCTGGTTCCTAGC  | 300 nM;<br>Ta=69°C              |
| PMCA4a reverse                        | GACGACTCTGATTGCCACAGGAG           | 300 nM;<br>Ta=69°C              |
| PMCA4b reverse                        | TATGGAACAGTTTGACGACTCTGATCTGAG    | 300 nM;<br>Ta=69°C              |
| PMCA4b forward                        | AGTGACAAAGAGGACATCAGCAGGGATACTGAG | 300 nM;<br>Ta=69°C              |
| PMCA4e forward                        | ACACCTTGATGTAAAACCTGGTTCCTAGCTC   | 300 nM;<br>Ta=69°C              |
| PMCA4e reverse                        | AACAGTTTGACGACTCTGATTCTCACTCAC    | 300 nM;<br>Ta=69°C              |
| 5'UTR forward                         | GCTACTCTGAAACTTATTGCACGAG         | Ta=60°C                         |
| Mid-cDNA reverse                      | CTTCACTGGCCATGGGCTCAATG           | Ta=60°C                         |
| Mid-cDNA forward                      | TCATTGAGCCCATGGCCAGTGAAG          | Ta=60°C                         |
| 3'UTR reverse                         | CCACCGTCACATACAGATGG              | Ta=60 °C                        |
| PMCA4-exon-3-forward<br>(Genomic PCR) | AACGTGATACCTCCAAAAAGGCCCAAG       | Ta=65°C<br>Amplicon = 816<br>bp |
| PMCA4-exon-4-reverse<br>(Genomic PCR) | AATTTTGTCTCCAGTTCGATGCGACTC       | Ta=65°C<br>Amplicon = 816<br>bp |

**Table-S-I Legend: Note:** f, forward; r, reverse; Ta, annealing temperature; EGFP, enhanced green fluorescent protein; all qRT-PCR primer pairs generated single amplicon peaks.

**TABLE S-II: Genes Modulated in P4KO vs. P4WT cells (Early G<sub>1</sub> Stage)**

| <b>Fold Change</b> | <b>p-value</b>  | <b>Symbol</b> | <b>Definition</b>                                                                           |
|--------------------|-----------------|---------------|---------------------------------------------------------------------------------------------|
| 47.5               | 2.39E-09        | Casp1         | Caspase 1 (ICE); down regulates c-myc; inflammatory.                                        |
| <b>39.4</b>        | <b>6.38E-09</b> | <b>Rgs16</b>  | <b>Regulator of G-protein signaling 16 (Rgs16); inhibits p38MAPK; NFAT suppresses Rgs16</b> |
| 21.2               | 6.38E-09        | Gpnmb         | Glycoprotein (transmembrane) nmb (Gpnmb)                                                    |
| <b>69.1</b>        | <b>8.95E-09</b> | <b>Dcn</b>    | <b>Decorin; tumor suppressor; reduces tumor metastases</b>                                  |
| 14.2               | 1.24E-08        | Adm           | Adrenomedullin (Adm)                                                                        |
| 30.6               | 1.24E-08        | Pdpn          | Podoplanin; transmembrane glycoprotein                                                      |
| 20.9               | 1.49E-08        | Lce1f         | Late cornified envelope 1F                                                                  |
| 40.2               | 1.54E-08        | LOC100048554  | PREDICTED: similar to monocyte chemoattractant protein-2 (MCP-2).                           |
| 23.5               | 1.54E-08        | Serpib2       | Serine (or cysteine) peptidase inhibitor, clade B, member 2 (Serpib2)                       |
| -6.6               | 3.81E-08        | Rcan2         | Regulator of Calcineurin 2 mRNA                                                             |
| -3.6               | 4.02E-05        | E2f2          | E2F transcription factor 2 mRNA                                                             |

**TABLE S-III: Genes Known to be Implicated in G<sub>1</sub> Phase Arrest  
(P4KO vs. P4WT cells in early G<sub>1</sub> stage)**

| <b>Fold Change</b> | <b>Symbol</b> | <b>Definition</b>                                                                |
|--------------------|---------------|----------------------------------------------------------------------------------|
| <b>69.1</b>        | <b>Dcn</b>    | <b>decorin (Dcn); tumor suppressor; reduces tumor metastases</b>                 |
| 5.2                | Igf1          | insulin-like growth factor 1; regulates MAPK/Akt pathway                         |
| 5                  | Itga5         | integrin alpha 5 (fibronectin receptor alpha)                                    |
| 4.2                | Egfr          | epidermal growth factor receptor; tumor metastases                               |
| 3.9                | Fgf2          | fibroblast growth factor 2                                                       |
| 3.4                | Ngf           | nerve growth factor                                                              |
| 3.3                | Dusp1         | dual specificity phosphatase 1; ER stress induced apoptosis                      |
| 2.8                | Csf1          | colony stimulating factor 1; induces NFATc1 degradation                          |
| 2.1                | Akap12        | A kinase (PRKA) anchor protein 12; cell growth-related protein                   |
| 2.1                | Cdkn2A        | cyclin-dependent kinase inhibitor 2A; p16(INK4a); tumor suppressor               |
| -3.6               | E2f2          | E2F transcription factor 2; tumor suppressor                                     |
| -3.5               | Mcm7          | minichromosome maintenance deficient 7; chromosomal DNA replication factor       |
| -3.2               | Mybl2         | Myeloblastosis oncogene-like 2 (Mybl2); B-Myb; S and G2/M phase regulation       |
| -3                 | Notch1        | Notch gene homolog 1; tumor suppressor effect in myeloid leukemia                |
| -2.8               | Rbl1          | retinoblastoma-like 1 (p107); cell cycle regulation                              |
| -2.5               | Pim1          | proviral integration site 1; regulates S phase entry                             |
| -2.2               | Mtbp          | Mdm2, transformed 3T3 cell double minute p53 binding protein; Myc regulator      |
| -2.2               | Cdkn1B        | cyclin-dependent kinase inhibitor 1B; p27 or Kip1; regulates cell cycle exit     |
| -2.1               | Cdkn1C        | cyclin-dependent kinase inhibitor 1C (p57 or Kip2); regulator of cell cycle exit |

**TABLE S-IV: NFAT Facilitator Proteins, NFAT pathway modulators and NFAT Targets  
(P4KO vs. P4WT in early G<sub>1</sub> stage)**

| <b>Fold Change</b> | <b>p-value</b>  | <b>Gene Name</b> | <b>Definition</b>                                               |
|--------------------|-----------------|------------------|-----------------------------------------------------------------|
| <b>69.1</b>        | <b>8.95E-09</b> | <b>Dcn</b>       | <b>Decorin (Dcn), mRNA.</b>                                     |
| <b>39.4</b>        | <b>6.38E-09</b> | <b>Rgs16</b>     | <b>Regulator of G-protein signaling 16 (Rgs16), mRNA.</b>       |
| -6.6               | 3.81E-08        | Rcan2            | Regulator of calcineurin 2 (Rcan2), transcript variant 1, mRNA. |
| -1.8               | 0.002574978     | Rcan1            | Regulator of calcineurin 1 (Rcan1), transcript variant 2, mRNA. |
| -3.6               | 4.02E-05        | E2f2             | E2F transcription factor 2 (E2f2), mRNA.                        |

**TABLE S-V: Genes Modulated in PMCA4a-Rescued P4KO at Late G<sub>1</sub>/S Stage  
(PMCA4a-rescued P4KO vs. P4KO)**

| <b>FoldChange</b> | <b>p-value</b> | <b>Symbol</b> | <b>Definition</b>                                                                                                                                    |
|-------------------|----------------|---------------|------------------------------------------------------------------------------------------------------------------------------------------------------|
| <b>-44.6</b>      | <b>2.5E-10</b> | <b>Tfap2b</b> | <b>AP-2<math>\beta</math></b> , Activating enhancer-binding protein 2 beta, transcript variant 2 (inhibits Myc transactivation, inhibits cell cycle) |
| -15.5             | 4.7E-09        | Angpt2        | Angiopoietin 2 (disrupts vascular remodeling)                                                                                                        |
| -24.7             | 8.02E-09       | Pcdh17        | Protocadherin (cell-cell connections)                                                                                                                |
| -8.2              | 4.09E-08       | Tfap2a        | AP-2 $\alpha$ , Activating enhancer-binding protein 2 alpha (transcription activator/repressor; mutations cause branchio-oculo facial syndrome)      |
| <b>-1.27</b>      | <b>NS</b>      | <b>Dcn</b>    | <b>Decorin</b>                                                                                                                                       |
| <b>+1.1</b>       | <b>NS</b>      | <b>Rgs16</b>  | <b>Rgs16</b>                                                                                                                                         |
| +4.9              | 1.68E-07       | Tnxb          | Tenascin XB (matrix maturation during wound healing)                                                                                                 |
| +7.8              | 2.15E-07       | Tnfrsf11b     | Tumor necrosis factor receptor superfamily, member 11b (vascular calcification)                                                                      |
| +4.8              | 2.74E-07       | Slitrk5       | SLIT and NTRK-like family, member 5 (axonogenesis)                                                                                                   |
| +9.1              | 5.56E-07       | Igf2bp3       | Insulin-like growth factor 2 mRNA binding protein 3 (represses translation of insulin-like growth factor-2)                                          |
| +4.9              | 7.26E-07       | Rragb         | Ras-related GTP binding B (Ras-homologous GTPases; signal transducers)                                                                               |

**TABLE S-VI: Genes Modulated in PMCA4b-Rescued P4KO at Late G<sub>1</sub>/S Stage  
(P4b-rescued P4KO vs. P4KO)**

| <b>Fold Change</b> | <b>p-value</b>  | <b>GeneName</b> | <b>Definition</b>                                                                                       |
|--------------------|-----------------|-----------------|---------------------------------------------------------------------------------------------------------|
| 24.4               | 1.85E-25        | Ptprd           | Protein tyrosine phosphatase, receptor type, D (Ptprd), transcript variant a, mRNA.                     |
| 14.9               | 1.97E-21        | Gjb3            | Gap Junction protein beta 3 mRNA                                                                        |
| 32.0               | 2.03E-21        | Anxa8           | Annexin A8 mRNA                                                                                         |
| -136.8             | 6.80E-24        | Dkk3            | Dickkopf homolog 3 (Xenopus laevis) (Dkk3), mRNA.                                                       |
| <b>-50.4</b>       | <b>8.51E-24</b> | <b>Cdkn2b</b>   | <b>Cyclin-dependent kinase inhibitor 2B (p15; inhibits CDK4) (Cdkn2b), mRNA.</b>                        |
| -13.4              | 8.72E-24        | Loxl1           | Lysyl oxidase-like 1 (Loxl1), mRNA.                                                                     |
| -23.9              | 8.72E-24        | Fgf10           | Fibroblast growth factor 10 (Fgf10), mRNA.                                                              |
| -22.3              | 1.37E-22        | Pdgfra          | Platelet derived growth factor receptor, alpha polypeptide (Pdgfra), transcript variant 1, mRNA.        |
| -9.2               | 4.87E-22        | Sema3f          | Sema domain, immunoglobulin domain (Ig), short basic domain, secreted, (semaphorin) 3 F (Sema3f), mRNA. |
| <b>-2.4</b>        | <b>1.59E-13</b> | <b>Dcn</b>      | <b>Decorin (Dcn), mRNA.</b>                                                                             |
| <b>-18.5</b>       | <b>3.07E-19</b> | <b>Rgs16</b>    | <b>Regulator of G-protein signaling 16 (Rgs16), mRNA.</b>                                               |

**TABLE S-VII: Genes Modulated in P4KO at Late G<sub>1</sub>/S Stage  
(P4KO vs. P4WT)**

| <b>Fold Change</b> | <b>p-value</b>  | <b>GeneName</b> | <b>Definition</b>                                                             |
|--------------------|-----------------|-----------------|-------------------------------------------------------------------------------|
| 39.4               | 1.20E-24        | Thy1            | Thymus cell antigen 1, theta (Thy1), mRNA.                                    |
| 33.0               | 7.76E-22        | Ly6a            | Lymphocyte antigen 6 complex, locus A (Ly6a), mRNA.                           |
| 64.7               | 1.12E-20        | Serpinf1        | Serine (or cysteine) peptidase inhibitor, clade F, member 1 (Serpinf1), mRNA. |
| 5.2                | 2.00E-20        | Igfbp4          | Insulin-like growth factor binding protein 4                                  |
| 7.4                | 2.82E-20        | Pcdh21          | Protocadherin 21 (Pcdh21), mRNA.                                              |
| <b>9.3</b>         | <b>3.24E-20</b> | <b>Dcn</b>      | <b>Decorin (Dcn), mRNA.</b>                                                   |
| 4.6                | 5.75E-20        | Nnmt            | Nicotinamide N-methyltransferase (Nnmt), mRNA.                                |
| 7.6                | 6.68E-20        | Spon2           | Spondin 2, extracellular matrix protein (Spon2), mRNA.                        |
| <b>15.1</b>        | <b>2.00E-18</b> | <b>Rgs16</b>    | <b>Mus musculus regulator of G-protein signaling 16 (Rgs16), mRNA.</b>        |
| -7.2               | 6.68E-20        | Dlx1            | Distal-less homeobox 1 mRNA                                                   |
| -5.8               | 3.12E-17        | Tuft1           | Tuftelin 1 mRNA                                                               |

**TABLE S-VIII: Genes Modulated in PMCA4b-Rescued P4KO at Late G<sub>1</sub>/S Stage  
(PMCA4b-rescued P4KO vs. Vector-control P4KO)**

| <b>FoldChange</b> | <b>p-value</b>  | <b>Symbol</b> | <b>Definition</b>                                                                        |
|-------------------|-----------------|---------------|------------------------------------------------------------------------------------------|
| 22.5              | 1.48E-24        | Pacrg         | Park2 co-regulated mRNA                                                                  |
| 9.0               | 5.59E-21        | Gpc1          | Glypican 1 mRNA                                                                          |
| -28.0             | 1.29E-24        | Ogn           | Osteoglycin (Ogn), mRNA.                                                                 |
| -15.3             | 1.29E-24        | Ppap2b        | Phosphatidic acid phosphatase type 2B (Ppap2b), mRNA.                                    |
| -17.4             | 3.56E-24        | Atp1b1        | ATPase, Na <sup>+</sup> /K <sup>+</sup> transporting, beta 1 polypeptide (Atp1b1), mRNA. |
| -7.3              | 4.31E-22        | Dusp1         | Dual specificity phosphatase 1 (Dusp1), mRNA.                                            |
| <b>-15.3</b>      | <b>5.55E-22</b> | <b>Dcn</b>    | <b>Decorin (Dcn), mRNA.</b>                                                              |
| -22.5             | 5.69E-22        | Cdkn2b        | Cyclin-dependent kinase inhibitor 2B ( <b>p15, inhibits CDK4</b> ) (Cdkn2b), mRNA.       |
| -7.7              | 8.59E-22        | Lox11         | Lysyl oxidase-like 1 (Lox11), mRNA.                                                      |
| -7.9              | 9.58E-22        | Ier3          | Immediate early response 3 (Ier3), mRNA.                                                 |
| <b>-3.9</b>       | <b>9.25E-14</b> | <b>Rgs16</b>  | <b>Regulator of G-protein signaling 16 (Rgs16), mRNA.</b>                                |

## **A**

**PMCA4-b** (alternatively spliced variant) =

**PMCA4-a** (classical exon-20 of 181 nt) =

**PMCA4-e** (novel exon-20 of 191 nt) =

**VASHSDSPLPSLETPV**

**AVTSPPVGNQSRQTVP**

**AVTSPPVGSE**

## **B**

Peptide used for PMCA4b Antibody =

Peptide used for PMCA4a/e Antibody =

**SHSDSPLPSLETPV**

**QTEAPLKRVRNMTQHLD**

**C**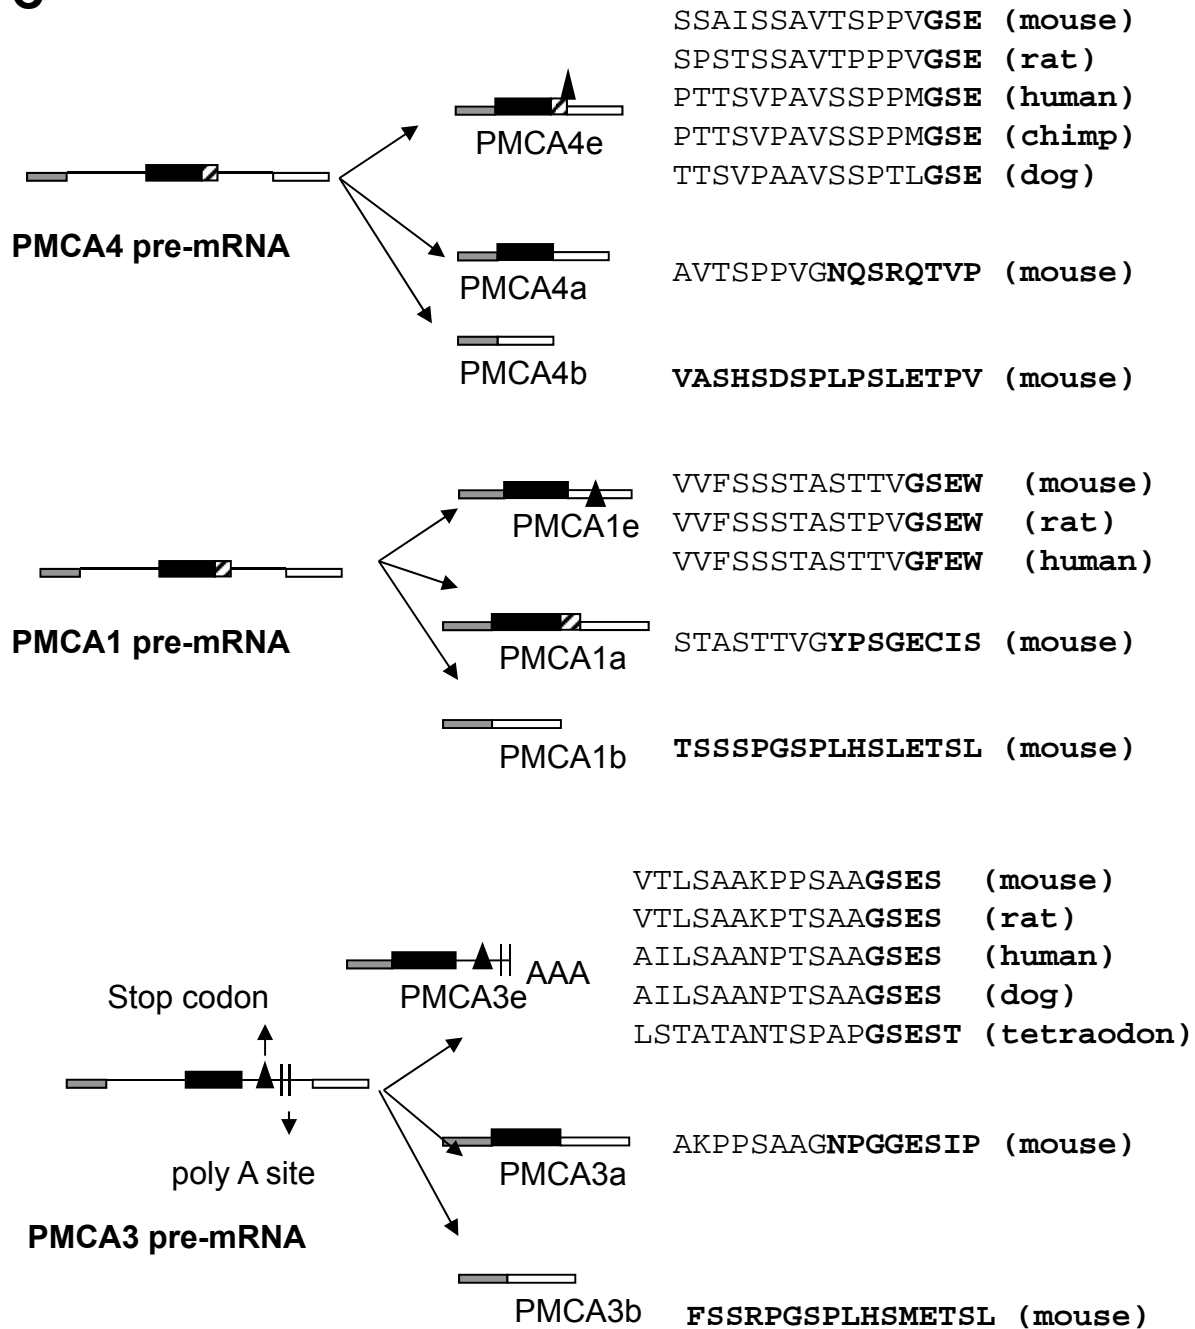

**Figure S-1. (A)** Predicted amino acid sequences at the C-terminus of the cloned splice variants. Bold letters denote exon-20 or exon-21 encoded residues. **(B)** Sequences of peptides used to generate chicken polyclonal Abs against PMCA4b and PMCA4a/e splice variants. Bold letters denote residues conserved between mouse and rat PMCA4. **(C)** Schematic representation and relevant sequences of alternatively spliced PMCA genes. Lines show introns, rectangles are exons, and filled triangles are in-frame stop codons. Sequences at the carboxy tails of resulting splice variants are displayed. Bold letters show residues expressed as a result of exon inclusion or exclusion. NB: alternative splicing at site C of PMCA1 and PMCA3 is more complex than shown. The schematic emphasizes instead the similarities between 'e' variants of PMCA1, PMCA3 and PMCA4.



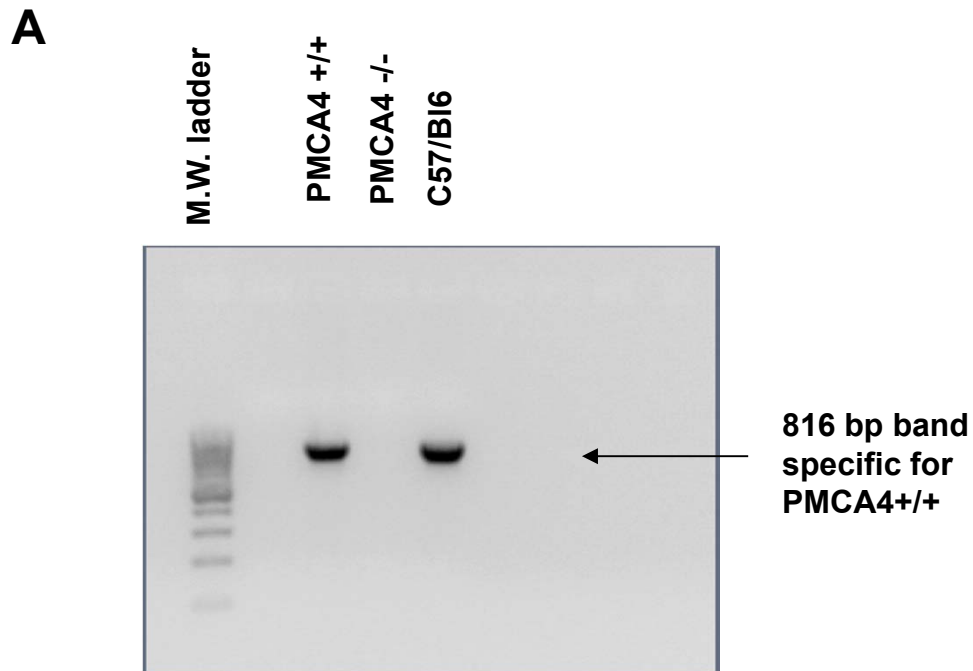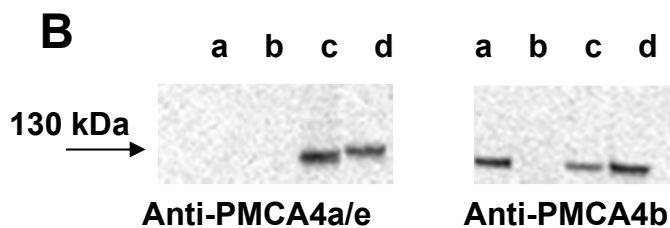

**Figure S-II. Validation of PMCA4a/e and PMCA4b specific antibodies (A)** Genomic PCR using exon-3 and exon-4 specific primers confirmed that the Neyses lab-generated PMCA4<sup>-/-</sup> mouse hearts (in which exons-2 and -3 have been deleted) lack these PMCA4 exons from their genome. **(B)** Immunoblots of microsomal protein extracts made from (a) C57bl6 heart, (b) PMCA4<sup>-/-</sup> mouse heart, (c) C57bl6 stomach and (d) C57bl6 brain were probed with affinity purified chicken polyclonal antibodies raised against peptides specific for PMCA4b and PMCA4a/e. Note that the PMCA4a/e antibody did not give a band for normal mouse heart (lane a) presumably because of negligible PMCA4a expression in the heart.

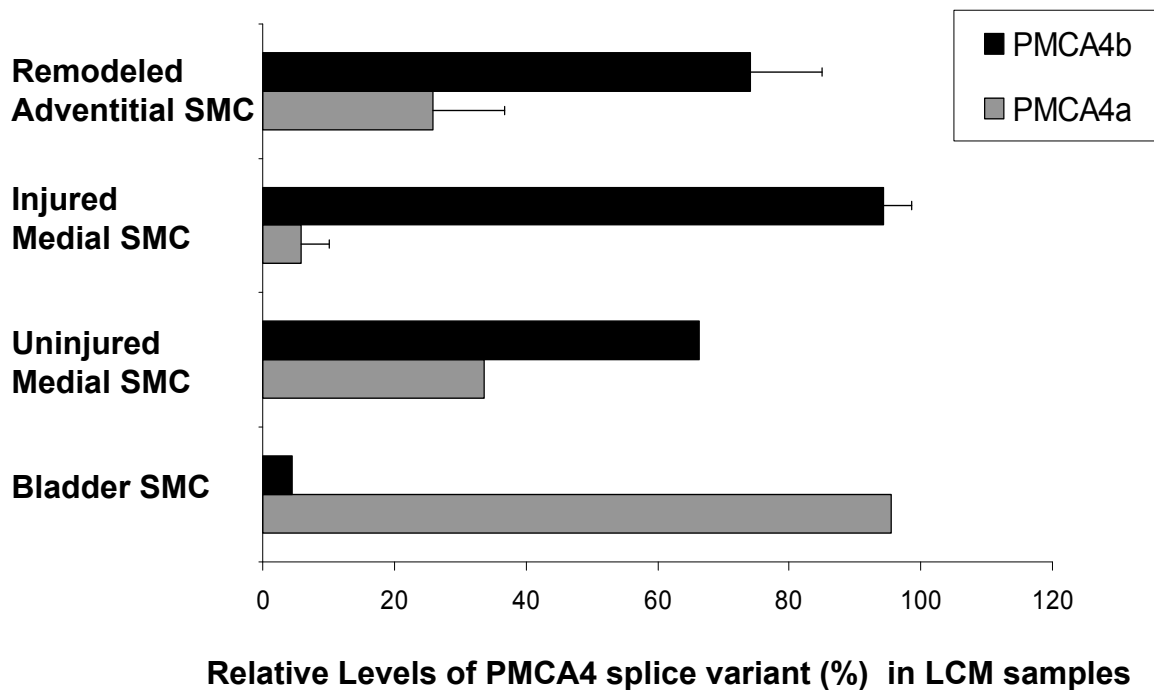

**Figure S-III. Laser capture microdissection (LCM)** was used to obtain uninjured media (n=1), injured media (n=3) and remodeled adventitia regions (n=2) from mouse carotid artery cross-sections (8-10 wk old male; day-9 post injury). Bladder smooth muscle region (n=1) was used to show that the LCM protocol could demonstrate high relative PMCA4a abundance observed in Fig1A. These microdissected regions were used to isolate RNA, make cDNA and carry out qRT-PCR for microglobulin (housekeeping gene) and PMCA4a and PMCA4b to calculate microglobulin-normalized relative proportions of PMCA4a:4b splice variants in the various arterial regions.

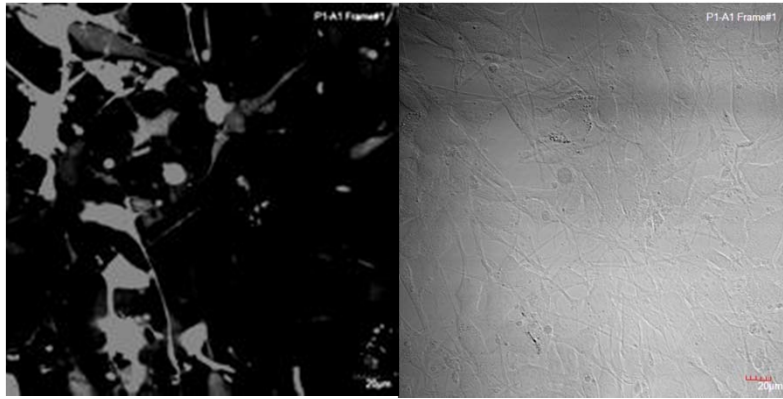

**CA-137 electroporation parameters: 67% efficiency**  
**Mean of 4 fields of view; > 100 cells counted; not much cell death**

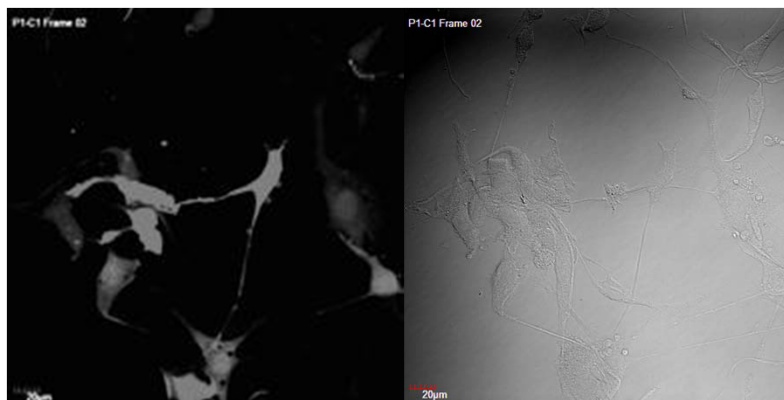

**CM-137 electroporation parameters: 100% efficiency**  
**Mean of 3 fields of view ~50 cells counted; significant cell death**

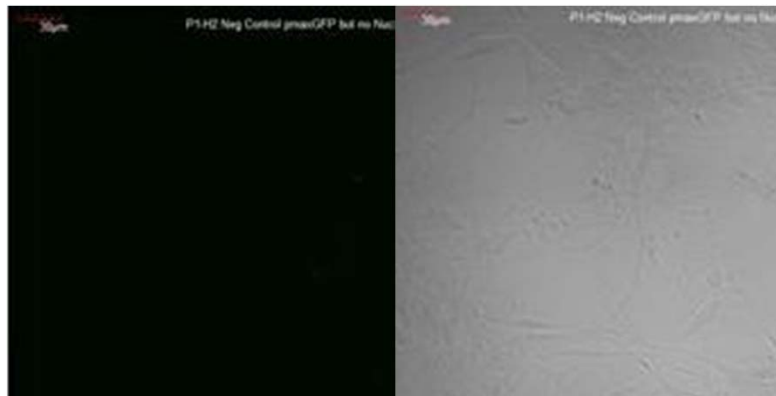

**Negative Control: No electroporation parameters used; cells incubated with maxGFP plasmid in cuvette**

**Figure S-IV. Optimization of Electroporation Parameters.** maxGFP plasmid, mouse primary carotid artery smooth muscle cells, Lonza P1 Nucleofection Mix and Lonza 4D Nucleofector were used.

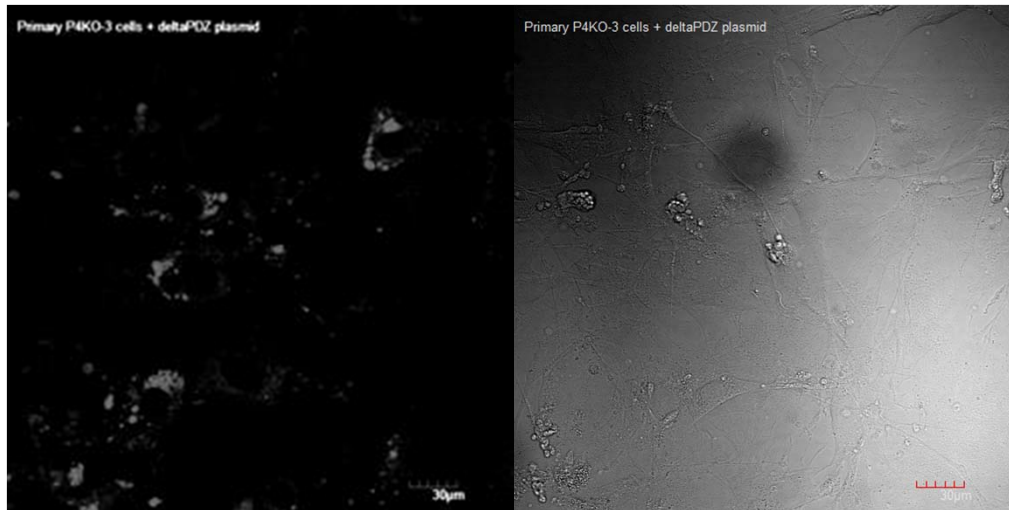

**EGFP-huPMCA4b- $\Delta$ -PDZ construct electroporated into P4KO cells**

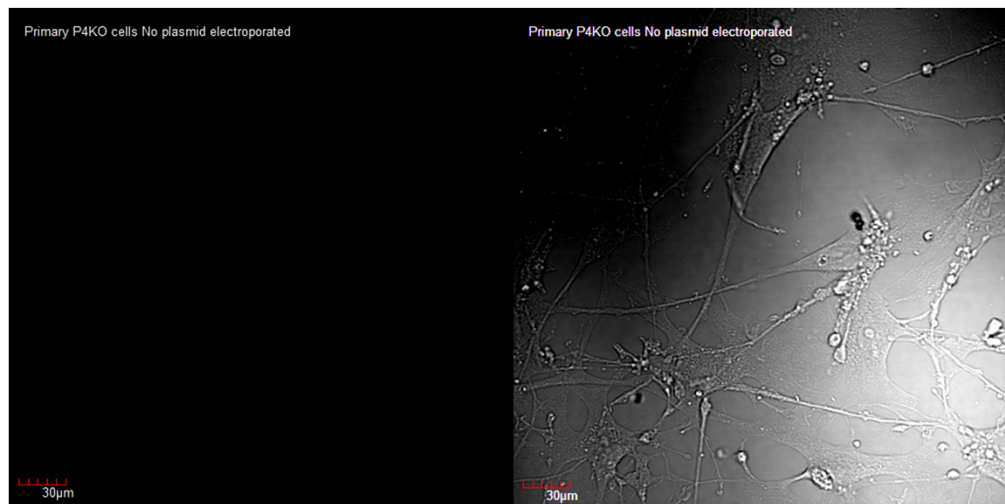

**Unelectroporated P4KO cells**

**Figure S-V. Validation of electroporation of PMCA4 cDNA into VSMCs.** EGFP-tagged human PMCA4b- $\Delta$ -PDZ cDNA construct was electroporated into P4KO primary carotid artery smooth muscle cells using the Lonza 4D Nucleofector. Electroporated cells were seeded on cover slips, allowed to recover for 24 h, fixed with paraformaldehyde, washed with PBS, mounted on slides and used for confocal imaging.

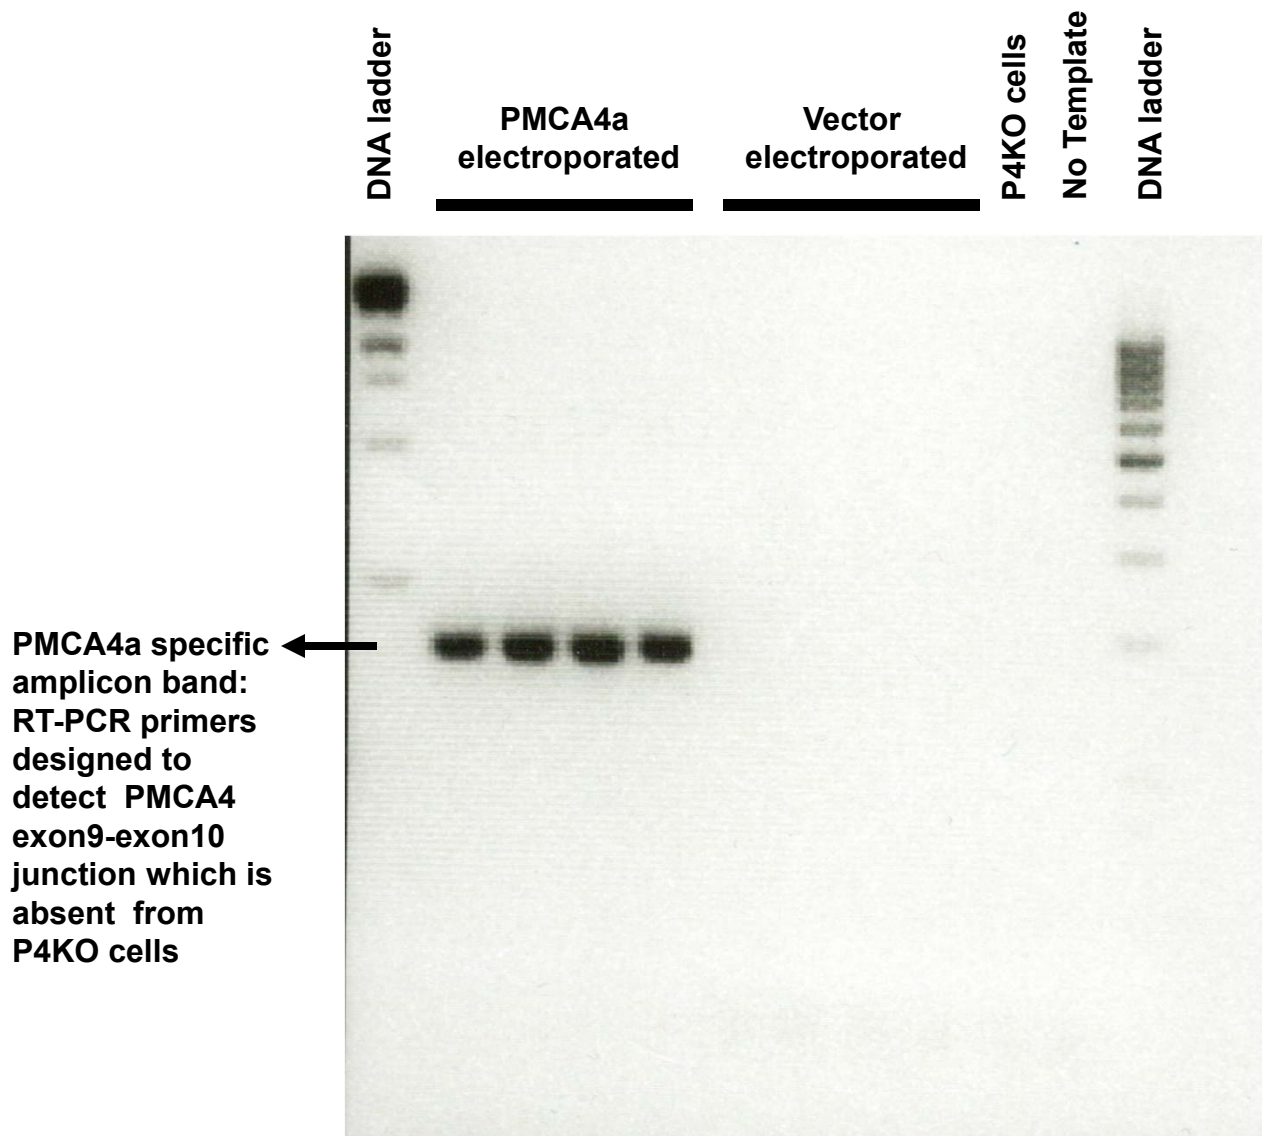

**Figure S-VI. RT-PCR validation of electroporation of PMCA4 cDNA into VSMCs.** P4KO cells carry a genetic deletion whereby exon-9 has been removed and exon-8 splices to exon-10 in mature PMCA4 mRNA. Mouse PMCA4a cDNA construct encodes exon-9 joined to exon-10. RT-PCR primers designed to detect this exon-9-exon-10 junction were used to screen cDNA made from P4KO cells, P4KO cells rescued with vector and P4KO cells rescued with mouse PMCA4a cDNA (cells were subjected to puromycin selection for 14 days after electroporation). Agarose gel electrophoresis showed exon-9-exon-10 junction only in those P4KO cells which received PMCA4a cDNA.

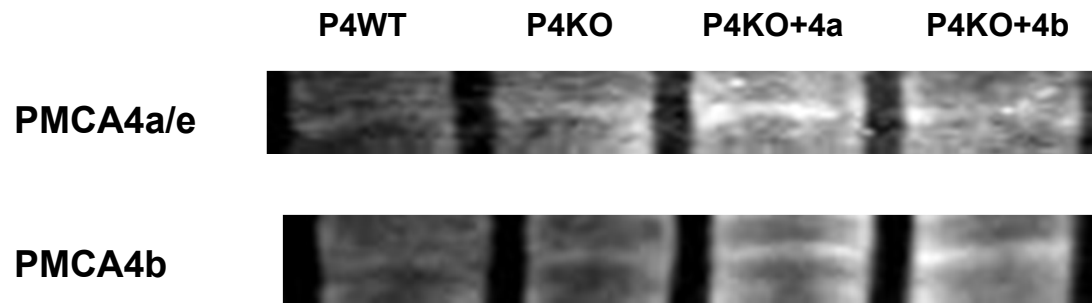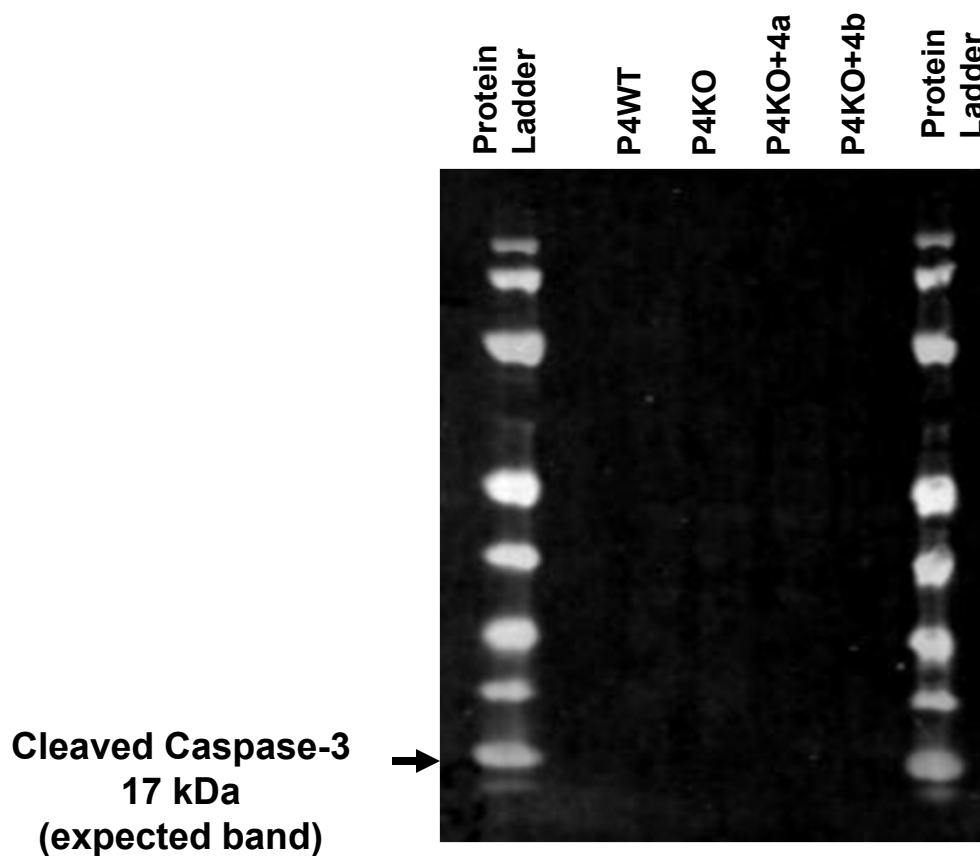

**Figure S-VII. PMCA4a/e, PMCA4b and cleaved Caspase-3 Western blots.** Whole cell protein extracts made from P4WT, P4KO, P4KO+4a and P4KO+4b rescued primary carotid VSMCs were used for immunoblots probed with anti-PMCA4a/e, anti-PMCA4b or anti-cleaved Caspase-3 (apoptosis marker) antibodies. LiCor's IR680 fluorescent dye conjugated secondary antibodies (anti-chicken for PMCA4a/e and PMCA4b and anti-rabbit for cleaved Caspase-3) were used and blots were imaged with the Odyssey fluorescent scanner (LiCor, NE). PMCA4a was overexpressed 1.5-fold in P4KO+4a cells while PMCA4b was overexpressed 1.8-fold in P4KO+4b cells as compared to P4KO cells. There was no cleaved Caspase-3 band visible which signifies absence of any apoptosis in these cells.

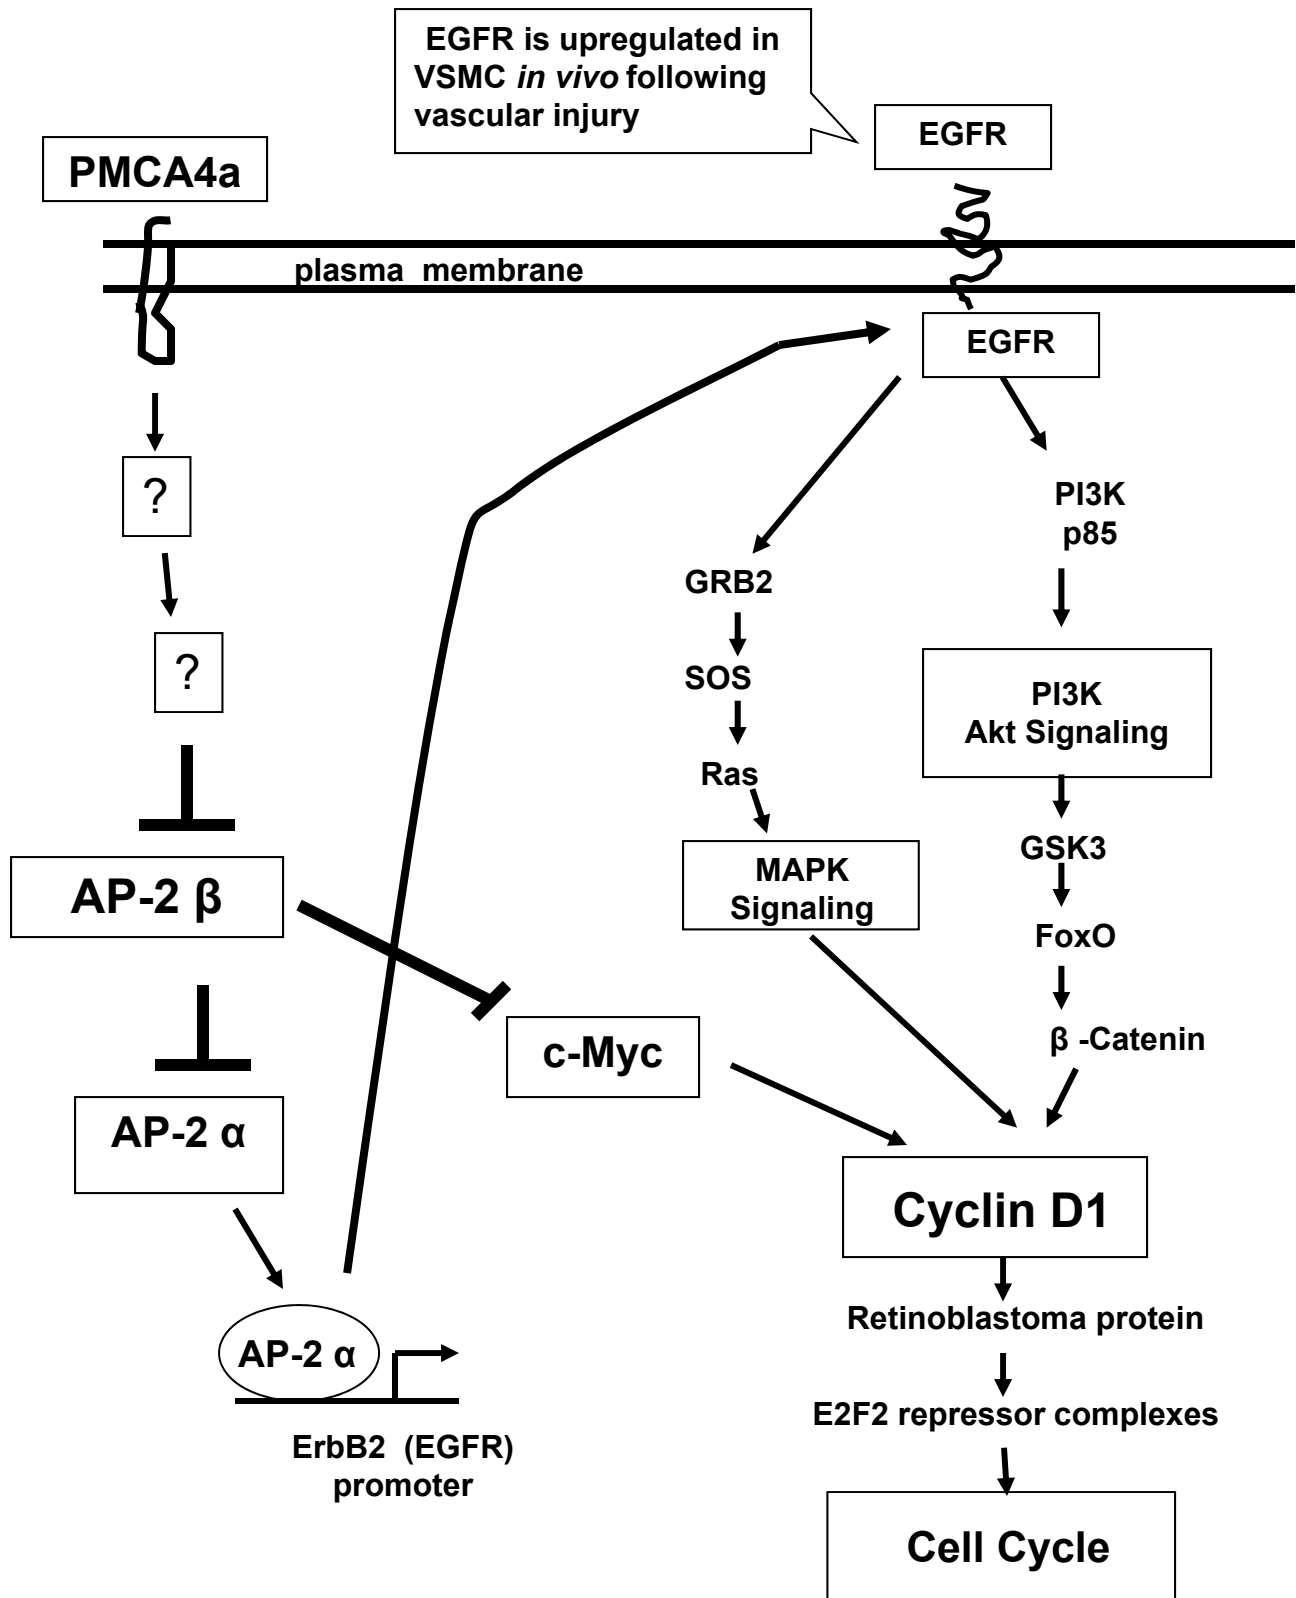

**Figure S-VIII. Schematic showing role of proteins modulated by PMCA4a overexpression in PMCA4 knockout cells.** AP-2 $\beta$  represses Myc transactivation and also inhibits AP-2  $\alpha$  from binding to the EGFR promoter and enhancing proliferation. PMCA4a overexpression in PMCA4 knockout VSMC de-represses Myc activity and allows AP-2  $\alpha$  to induce EGFR expression which leads to enhanced proliferation. PMCA4a effects on Decorin and Rgs16 omitted for simplicity.

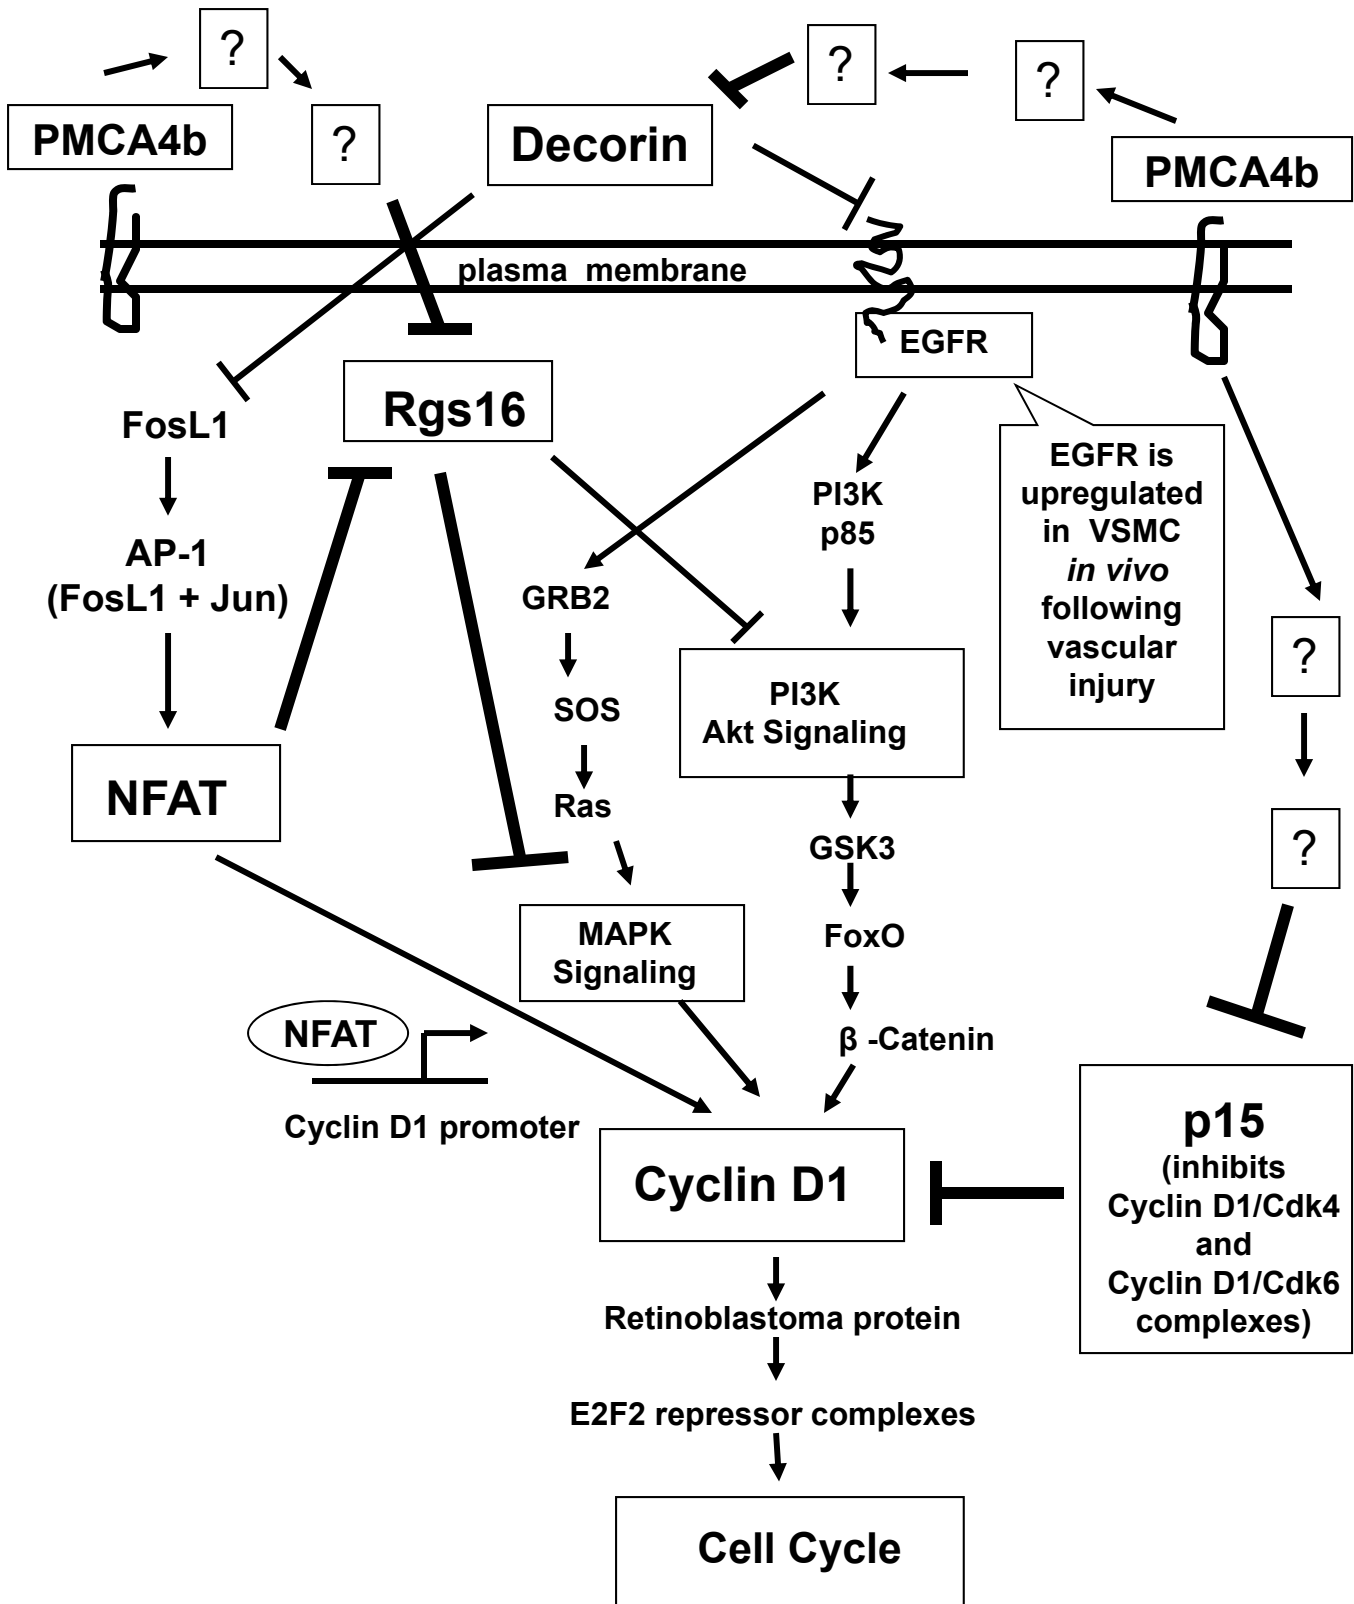

**Figure S-IX. Schematic showing role of proteins modulated by PMCA4b overexpression in PMCA4 knockout cells.** PMCA4b overexpression in PMCA4 knockout VSMC represses Rgs16 and Decorin, which in turn regulates NFAT and Cyclin D1 expression in the early G1 phase of the cell cycle.
